# Supplementary material for: Implication of Opioid Receptors in the Antihypertensive Effect of a Novel Chicken Foot-Derived Peptide
Source: MDPI journal article supplement (doi:10.3390/biom10070992), 2020-07-02
Supplement: s1 [file s1]

## SUPPLEMENTARY MATERIAL

Table S1. Recovery and reproducibility of the evaluated peptide extraction methods from plasma

| Methods   | Recovery (%) <sup>a</sup> | RSD (%) <sup>b</sup> |
|-----------|---------------------------|----------------------|
| SPE       | 92.4                      | 2.5                  |
| TFA       | 48.2                      | 28.3                 |
| TFA + SPE | 37.8                      | 26.5                 |

SPE, plasma + solid phase extraction; TFA, plasma + trifluoroacetic acid; TFA + SPE, trifluoroacetic acid + solid phase extraction. <sup>a</sup> Average percent recovery of the peptides by the described method (n= 3). <sup>b</sup> Repeatability (RSD—relative standard deviation of determined concentration).
